# Supplementary material for: Experimental and computational investigation of the bond energy of thorium dicarbonyl cation and theoretical elucidation of its isomerization mechanism to the thermodynamically most stable isomer, thorium oxide ketenylidene cation, OTh+CCO
Source: Royal Society of Chemistry journal article supplement (doi:10.1039/d1cp04263g), 2021-12-07
Supplement: d1cp04263g1.pdf [file d1cp04263g1.pdf]

## Supporting Information

For

Experimental and Computational Investigation of the Bond Energy of Thorium Dicarboxyl Cation and Theoretical Elucidation of Its Isomerization Mechanism to the Thermodynamically Most Stable Isomer, Thorium Oxide Ketenylidene Cation,  $\text{OTh}^+\text{CCO}$

Arjun Kafle and P. B. Armentrout\*

*Department of Chemistry, University of Utah, 315 S 1400 E Rm 2020, Salt Lake City, UT 84112*

Table S1. Molecular parameters calculated at the B3LYP/cc-pVQZ level used for modelling with Eq. (1)

| Species (state)                               | Vibrational frequencies $\omega_e$ ( $\text{cm}^{-1}$ ) <sup>a</sup> | Rotational constants (B, $\text{cm}^{-1}$ ) |
|-----------------------------------------------|----------------------------------------------------------------------|---------------------------------------------|
| CO ( $^1\Sigma^+$ )                           | 2214                                                                 | 1.947                                       |
| Th <sup>+</sup> (CO) ( $^4\Sigma^-$ )         | 308(2)                                                               | 0.075                                       |
|                                               | 346                                                                  |                                             |
|                                               | 1953                                                                 |                                             |
| Th <sup>+</sup> (CO) <sub>2</sub> ( $^4B_2$ ) | 43                                                                   | 0.035                                       |
|                                               | 283                                                                  | 0.064                                       |
|                                               | 293                                                                  | 0.078                                       |
|                                               | 294                                                                  |                                             |
|                                               | 296                                                                  |                                             |
|                                               | 308                                                                  |                                             |
|                                               | 349                                                                  |                                             |
|                                               | 1972                                                                 |                                             |
|                                               | 2031                                                                 |                                             |

<sup>a</sup>

Degeneracies

in

parentheses

Table S2. Comparison of molecular parameters of ground state of neutral Th(CO)<sub>2</sub> (C<sub>2v</sub>) and OThCCO (C<sub>s</sub>) calculated at the B3LYP/cc-pVQZ level compared to the literature

| Species                                | State                       | Method                  | r (Å) |       |       |       | ∠CThC<br>(°) | ∠OThC<br>(°) | C-O<br>stretch ω <sub>e</sub> (cm <sup>-1</sup> ) |        |
|----------------------------------------|-----------------------------|-------------------------|-------|-------|-------|-------|--------------|--------------|---------------------------------------------------|--------|
|                                        |                             |                         | Th-C  | C-O   | Th-O  | C-C   |              |              | anti.symm.                                        | symm.  |
| Th(CO) <sub>2</sub> (C <sub>2v</sub> ) | <sup>1</sup> A <sub>1</sub> | B3LYP                   | 2.280 | 1.168 |       |       | 51           |              | 1829                                              | 1870   |
| Th(CO) <sub>2</sub> (C <sub>2v</sub> ) | <sup>1</sup> A <sub>1</sub> | PW91 <sup>a</sup>       | 2.251 | 1.188 |       |       | 50           |              | 1734                                              | 1766   |
| Th(CO) <sub>2</sub> (C <sub>2v</sub> ) | <sup>1</sup> A <sub>1</sub> | Experiment <sup>a</sup> |       |       |       |       |              |              | 1775.6                                            | 1827.7 |
| OTh <sup>+</sup> CCO (C <sub>s</sub> ) | <sup>1</sup> A'             | B3LYP                   | 2.183 | 1.175 | 1.877 | 1.290 |              | 116          |                                                   | 2119   |
|                                        | <sup>1</sup> A'             | PW91 <sup>a</sup>       | 2.159 | 1.186 | 1.886 | 1.297 |              | 116          |                                                   | 2082   |
|                                        |                             | Experiment <sup>a</sup> |       |       |       |       |              |              |                                                   | 2048.6 |

<sup>a</sup> J. Li, B. E. Bursten, M. Zhou and L. Andrews, *Inorg. Chem.*, 2001, **40**, 5448 – 5460.

Table S3. Natural charges and valence electron configuration of C, O, and Th in low-lying states of  $\text{Th}^+(\text{CO})_2$  ( $C_{2v}$  and  $D_{\infty h}$ ) isomer obtained from an NBO analysis calculated at the B3LYP/cc-pVQZ level. Low-lying states are ordered on the basis of their energy with respect to the  $^4B_2$  ground state

| Species                                                    | State          | Charge |            |              | Configuration                            |                                             |                                 |
|------------------------------------------------------------|----------------|--------|------------|--------------|------------------------------------------|---------------------------------------------|---------------------------------|
|                                                            |                | Th     | C          | O            | Th                                       | C                                           | O                               |
| $\text{Th}^+(\text{CO})_2$ ( $C_{2v}$ )                    | $^4B_2$        | 1.47   | 0.12       | -0.35        | $[\text{Rn}]7s^{0.14}6d^{2.21}5f^{0.21}$ | $[\text{He}]2s^{1.37}2p^{2.48}$             | $[\text{He}]2s^{1.70}2p^{4.62}$ |
|                                                            | $^4B_1$        | 1.30   | 0.20       | -0.34        | $[\text{Rn}]7s^{0.67}6d^{1.81}5f^{0.22}$ | $[\text{He}]2s^{1.37}2p^{2.40}$             | $[\text{He}]2s^{1.70}2p^{4.61}$ |
|                                                            | $^2B_1$        | 1.46   | 0.13       | -0.36        | $[\text{Rn}]7s^{0.63}6d^{1.76}5f^{0.19}$ | $[\text{He}]2s^{1.33}2p^{2.50}$             | $[\text{He}]2s^{1.69}2p^{4.64}$ |
|                                                            | $^2A_1$        | 1.52   | 0.11       | -0.37        | $[\text{Rn}]7s^{0.32}6d^{2.04}5f^{0.18}$ | $[\text{He}]2s^{1.33}2p^{2.52}$             | $[\text{He}]2s^{1.69}2p^{4.64}$ |
| $\text{Th}^+(\text{CO})_2$ ( $D_{\infty h}$ )              | $^4\Sigma_g^-$ | 1.18   | 0.25       | -0.34        | $[\text{Rn}]7s^{0.85}6d^{1.89}5f^{0.07}$ | $[\text{He}]2s^{1.42}2p^{2.29}$             | $[\text{He}]2s^{1.70}2p^{4.60}$ |
|                                                            | $^2\Sigma_g^-$ | 1.20   | 0.23       | -0.34        | $[\text{Rn}]7s^{0.83}6d^{1.88}5f^{0.07}$ | $[\text{He}]2s^{1.42}2p^{2.30}$             | $[\text{He}]2s^{1.70}2p^{4.60}$ |
| $\text{Th}^+(\text{CO})_2$ ( $C_{\infty v}$ ) <sup>a</sup> | $^4\Delta$     | 1.25   | 0.18, 0.27 | -0.35, -0.35 | $[\text{Rn}]7s^{0.07}6d^{2.57}5f^{0.08}$ | $[\text{He}]2s^{1.44, 1.46}2p^{2.34, 2.23}$ | $[\text{He}]2s^{1.70}2p^{4.62}$ |
|                                                            | $^2\Pi_g$      | 1.52   | 0.11       | -0.37        | $[\text{Rn}]7s^{0.07}6d^{2.30}5f^{0.10}$ | $[\text{He}]2s^{1.42}2p^{2.43}$             | $[\text{He}]2s^{1.70}2p^{4.64}$ |
|                                                            | $^4\Pi_u$      | 1.70   | 0.03       | -0.37        | $[\text{Rn}]7s^{0.07}6d^{1.51}5f^{0.65}$ | $[\text{He}]2s^{1.44}2p^{2.50}$             | $[\text{He}]2s^{1.70}2p^{4.64}$ |
| $\text{Th}^+(\text{CO})_2$ ( $C_{\infty v}$ ) <sup>a</sup> | $^2\Delta$     | 1.28   | 0.20, 0.22 | -0.35, -0.35 | $[\text{Rn}]7s^{0.07}6d^{2.57}5f^{0.06}$ | $[\text{He}]2s^{1.44, 1.45}2p^{2.32, 2.29}$ | $[\text{He}]2s^{1.70}2p^{4.61}$ |
|                                                            | $^2\Pi_u$      | 1.70   | 0.03       | -0.38        | $[\text{Rn}]7s^{0.07}6d^{1.49}5f^{0.67}$ | $[\text{He}]2s^{1.44}2p^{2.50}$             | $[\text{He}]2s^{1.70}2p^{4.64}$ |

<sup>a</sup> Symmetry-broken states (as discussed in the text).

Table S4. Energies and zero-point energies for stationary states calculated along the potential energy profiles of  $\text{Th}^+\text{C}_2\text{O}_2$  for the formation of  $\text{OTh}^+\text{CCO}$  from addition of CO to  $\text{Th}^+/\text{Th}^+(\text{CO})$  calculated at the B3LYP/cc-pVQZ level<sup>a</sup>

| Species (state)                                          | Energy ( $E_h$ ) | ZPE ( $E_h$ ) <sup>b</sup> | $E_{\text{rel}}$ (eV) <sup>c</sup> |
|----------------------------------------------------------|------------------|----------------------------|------------------------------------|
| $\text{ThCO}^+ + \text{CO}$ ( $4\Sigma^- + 1\Sigma^+$ )  | -633.284108      | 0.011680                   | 0.00                               |
| $\text{ThCO}^+ + \text{CO}$ ( $2\Sigma^- + 1\Sigma^+$ )  | -633.277379      | 0.011671                   | 0.18                               |
| $\text{Th}^+ + 2\text{CO}$ ( $4F + 1\Sigma^+$ )          | -633.226603      | 0.010090                   | 1.52                               |
| $\text{Th}^+ + 2\text{CO}$ ( $2D + 1\Sigma^+$ )          | -633.229957      | 0.010090                   | 1.43                               |
| <b>1</b> $\text{Th}^+(\text{CO})_2$ ( $4\Sigma_g^-$ )    | -633.313339      | 0.012910                   | -0.76                              |
| <b>1</b> $\text{Th}^+(\text{CO})_2$ ( $2\Sigma_g^-$ )    | -633.307093      | 0.013095                   | -0.59                              |
| <b>TS1/2</b> ( $4A''$ )                                  | -633.309577      | 0.012328 (149i)            | -0.68                              |
| <b>TS1/2</b> ( $2A'$ )                                   | -633.288269      | 0.012377 (169i)            | -0.09                              |
| <b>2</b> $\text{Th}^+(\text{CO})_2$ ( $4B_2$ )           | -633.327301      | 0.013368                   | -1.13                              |
| <b>2</b> $\text{Th}^+(\text{CO})_2$ ( $2B_1$ )           | -633.320812      | 0.014015                   | -0.94                              |
| <b>TS2/3</b> ( $4A$ )                                    | -633.295005      | 0.011814 (279i)            | 0.29                               |
| <b>TS2/3</b> ( $2A$ )                                    | -633.290028      | 0.011844 (281i)            | 0.16                               |
| <b>3</b> $\text{OTh}^+(\eta^2\text{-CO})$ ( $4A$ )       | -633.303217      | 0.012275                   | -0.50                              |
| <b>3</b> $\text{OTh}^+(\eta^2\text{-CO})$ ( $2A$ )       | -633.296719      | 0.012231                   | -0.33                              |
| <b>4TS3/4</b> ( $4A$ )                                   | -633.297915      | 0.011797 (126i)            | -0.37                              |
| <b>44</b> $\text{Th}^+(\eta^3\text{-OC(CO)})$ ( $4A''$ ) | -633.300014      | 0.0124626                  | -0.41                              |
| <b>4TS4/5</b> ( $4A''$ )                                 | -633.274621      | 0.012179 (393i)            | 0.27                               |
| <b>45</b> $\text{Th}^+(\eta^3\text{-OCCO})$ ( $4A''$ )   | -633.276543      | 0.012990                   | 0.24                               |

Table S3. Contd.

|                                                                |              |                         |              |
|----------------------------------------------------------------|--------------|-------------------------|--------------|
| <b><sup>4</sup>TS5/6</b> ( <sup>4</sup> A'')                   | -633.269163  | 0.014296 (249i)         | 0.48         |
| <b><sup>2</sup>TS3/6</b> ( <sup>2</sup> A)                     | -633.271599  | <i>0.011076 (610i)</i>  | <i>0.32</i>  |
| <b>6</b> Th <sup>+</sup> ( $\eta^2$ -OCCO) ( <sup>4</sup> A'') | -633.296632  | 0.015393                | -0.24        |
| <b>6</b> Th <sup>+</sup> ( $\eta^2$ -OCCO) ( <sup>2</sup> A')  | -633.347456  | <i>0.015547</i>         | <i>-1.62</i> |
| <b>TS6/7</b> ( <sup>4</sup> A'')                               | -633.271981  | 0.012480 (739i)         | 0.35         |
| <b>TS6/7</b> ( <sup>2</sup> A')                                | -633.330979  | <i>0.013536 (1042i)</i> | <i>-1.22</i> |
| <b>7</b> OTh <sup>+</sup> CCO ( <sup>4</sup> A'')              | -633.3115412 | 0.0128411               | -0.71        |
| <b>7</b> OTh <sup>+</sup> CCO ( <sup>2</sup> A')               | -633.4005755 | <i>0.0139323</i>        | <i>-3.11</i> |

<sup>a</sup> Values for quartet and doublet species are indicated in roman and italics font, respectively.

<sup>b</sup> Zero-point energy. Imaginary frequencies in cm<sup>-1</sup> are included in parentheses.

<sup>c</sup> Energies are relative to Th<sup>+</sup>(CO) (<sup>4</sup> $\Sigma^-$ ) + CO (<sup>1</sup> $\Sigma^+$ ). No spin-orbit corrections are included.

Table S5. Energies and zero-point energies for optimized structures calculated using different levels of theory <sup>a</sup>

| Species (state)                                                     | Basis Sets | Level of Theory | Energy (E <sub>h</sub> ) | ZPE (E <sub>h</sub> ) | <s <sup>2</sup> > |
|---------------------------------------------------------------------|------------|-----------------|--------------------------|-----------------------|-------------------|
| CO ( <sup>1</sup> Σ <sup>+</sup> , C <sub>∞v</sub> )                | SDD        | B3LYP           | -113.35679               | 0.005051              | 0.00              |
|                                                                     |            | BHLYP           | -113.299148              | 0.005304              | 0.00              |
|                                                                     |            | MP2             | -113.136471              | 0.005051              | 0.00              |
|                                                                     |            | CCSD(T)         | -113.156536              | 0.005051              | 0.00              |
|                                                                     | cc-pVTZ    | B3LYP           | -113.358513              | 0.005032              | 0.00              |
|                                                                     |            | BHLYP           | -113.300378              | 0.005286              | 0.00              |
|                                                                     |            | MP2             | -113.139229              | 0.005032              | 0.00              |
|                                                                     |            | CCSD(T)         | -113.159112              | 0.005032              | 0.00              |
|                                                                     | cc-pVQZ    | B3LYP           | -113.366764              | 0.005045              | 0.00              |
|                                                                     |            | BHLYP           | -113.308749              | 0.005299              | 0.00              |
|                                                                     |            | MP2             | -113.169644              | 0.005045              | 0.00              |
|                                                                     |            | CCSD(T)         | -113.187776              | 0.005045              | 0.00              |
|                                                                     | CBS        | B3LYP           | -113.369023              | 0.005045              |                   |
|                                                                     |            | BHLYP           | -113.311041              | 0.005299              |                   |
|                                                                     |            | MP2             | -113.184644              | 0.005045              |                   |
|                                                                     |            | CCSD(T)         | -113.201765              | 0.005045              |                   |
| CCO ( <sup>3</sup> Σ <sup>-</sup> , C <sub>∞v</sub> )               | cc-pVQZ    | B3LYP           | -151.328379              | 0.008884              | 2.01              |
| ThCO <sup>+</sup> ( <sup>4</sup> Σ <sup>-</sup> , C <sub>∞v</sub> ) | SDD        | B3LYP           | -520.737507              | 0.006677              | 3.75              |
|                                                                     |            | BHLYP           | -520.439647              | 0.006949              | 3.76              |
|                                                                     |            | MP2             | -519.055811              | 0.006677              | 3.79              |
|                                                                     |            | CCSD(T)         | -519.082853              | 0.006677              | 3.79              |
|                                                                     | cc-pVTZ    | B3LYP           | -519.908720              | 0.006639              | 3.75              |
|                                                                     |            | BHLYP           | -519.600176              | 0.006912              | 3.76              |
|                                                                     |            | MP2             | -518.211641              | 0.006639              | 3.80              |
|                                                                     |            | CCSD(T)         | -518.238247              | 0.006639              | 3.80              |
|                                                                     | cc-pVQZ    | B3LYP           | -519.917316              | 0.006640              | 3.75              |
|                                                                     |            | BHLYP           | -519.608788              | 0.006914              | 3.76              |
|                                                                     |            | MP2             | -518.244039              | 0.006640              | 3.79              |
|                                                                     |            | CCSD(T)         | -518.268881              | 0.006640              | 3.79              |
|                                                                     | CBS        | B3LYP           | -519.919669              | 0.006640              |                   |
|                                                                     |            | BHLYP           | -519.611146              | 0.006914              |                   |
|                                                                     |            | MP2             | -518.260127              | 0.006640              |                   |
|                                                                     |            | CCSD(T)         | -518.283951              | 0.006640              |                   |

Table S5. continued.

| Species (state)                                                                                 | Basis Sets | Level of Theory | Energy ( $E_h$ ) | ZPE ( $E_h$ ) | $\langle s^2 \rangle$ |
|-------------------------------------------------------------------------------------------------|------------|-----------------|------------------|---------------|-----------------------|
| Th(CO) <sub>2</sub> <sup>+</sup> ( <sup>4</sup> B <sub>2</sub> , C <sub>2v</sub> )              | SDD        | B3LYP           | -634.136407      | 0.013442      | 3.76                  |
|                                                                                                 |            | BHLYP           | -633.774907      | 0.014031      | 3.76                  |
|                                                                                                 |            | MP2             | -632.228136      | 0.013442      | 3.81                  |
|                                                                                                 |            | CCSD(T)         | -632.271533      | 0.013442      | 3.81                  |
|                                                                                                 | cc-pVTZ    | B3LYP           | -633.310857      | 0.013353      | 3.76                  |
|                                                                                                 |            | BHLYP           | -632.938011      | 0.013949      | 3.76                  |
|                                                                                                 |            | MP2             | -631.389120      | 0.013353      | 3.81                  |
|                                                                                                 |            | CCSD(T)         | -631.431857      | 0.013353      | 3.81                  |
|                                                                                                 | cc-pVQZ    | B3LYP           | -633.327301      | 0.013368      | 3.76                  |
|                                                                                                 |            | BHLYP           | -632.954656      | 0.013965      | 3.76                  |
|                                                                                                 |            | MP2             | -631.452689      | 0.013368      | 3.81                  |
|                                                                                                 |            | CCSD(T)         | -631.492080      | 0.013368      | 3.81                  |
|                                                                                                 | CBS        | B3LYP           | -633.331803      | 0.013368      |                       |
|                                                                                                 |            | BHLYP           | -632.959214      | 0.013965      |                       |
| MP2                                                                                             |            | -631.484232     | 0.013368         |               |                       |
| CCSD(T)                                                                                         |            | -631.521692     | 0.013368         |               |                       |
| Th(CO) <sub>2</sub> <sup>+</sup> ( <sup>4</sup> B <sub>1</sub> , C <sub>2v</sub> )              | cc-pVQZ    | B3LYP           | -633.322359      | 0.013552      | 3.75                  |
| Th(CO) <sub>2</sub> <sup>+</sup> ( <sup>2</sup> B <sub>1</sub> , C <sub>2v</sub> )              |            |                 | -633.320812      | 0.014015      | 0.76                  |
| Th(CO) <sub>2</sub> <sup>+</sup> ( <sup>2</sup> A <sub>1</sub> , C <sub>2v</sub> )              |            |                 | -633.316527      | 0.014158      | 0.77                  |
| Th(CO) <sub>2</sub> <sup>+</sup> ( <sup>4</sup> B <sub>1</sub> , C <sub>2v</sub> )              |            |                 | -633.313423      | 0.013053      | 3.75                  |
| Th(CO) <sub>2</sub> <sup>+</sup> ( <sup>4</sup> Σ <sub>g</sub> <sup>-</sup> , D <sub>∞h</sub> ) |            |                 | -633.313339      | 0.012910      | 3.75                  |
| Th(CO) <sub>2</sub> <sup>+</sup> ( <sup>2</sup> Σ <sub>g</sub> <sup>-</sup> , D <sub>∞h</sub> ) |            |                 | -633.307093      | 0.013093      | 1.75                  |
| Th(CO) <sub>2</sub> <sup>+</sup> ( <sup>4</sup> Δ, C <sub>∞v</sub> )                            |            |                 | -633.296676      | 0.013741      | 3.75                  |
| Th(CO) <sub>2</sub> <sup>+</sup> ( <sup>2</sup> Π <sub>g</sub> , D <sub>∞h</sub> )              |            |                 | -633.296058      | 0.013685      | 0.75                  |
| Th(CO) <sub>2</sub> <sup>+</sup> ( <sup>4</sup> Π <sub>u</sub> , D <sub>∞h</sub> )              |            |                 | -633.292883      | 0.013626      | 3.76                  |
| Th(CO) <sub>2</sub> <sup>+</sup> ( <sup>2</sup> Δ, C <sub>∞v</sub> )                            |            |                 | -633.286424      | 0.013747      | 1.75                  |
| Th(CO) <sub>2</sub> <sup>+</sup> ( <sup>2</sup> Π <sub>u</sub> , D <sub>∞h</sub> )              |            |                 | -633.286474      | 0.013861      | 1.76                  |
| OTh <sup>+</sup> CCO ( <sup>2</sup> A', Cs)                                                     | cc-pVTZ    | B3LYP           | -633.384640      | 0.013968      | 0.76                  |
|                                                                                                 |            | BHLYP           | -633.006613      | 0.014553      | 0.77                  |
|                                                                                                 | cc-pVQZ    | B3LYP           | -633.400576      | 0.013932      | 0.76                  |
|                                                                                                 |            | BHLYP           | -633.022871      | 0.014513      | 0.77                  |
| OTh <sup>+</sup> CCO ( <sup>4</sup> A'', Cs)                                                    | cc-pVTZ    | B3LYP           | -633.295232      | 0.012862      | 3.77                  |
|                                                                                                 |            | BHLYP           | -632.923139      | 0.013536      | 3.78                  |
|                                                                                                 | cc-pVQZ    | B3LYP           | -633.311541      | 0.012841      | 3.77                  |
| ThO <sup>+</sup> ( <sup>2</sup> Σ <sup>+</sup> , C <sub>∞v</sub> )                              | cc-pVQZ    | B3LYP           | -481.931217      | 0.002198      | 0.75                  |

<sup>a</sup>All theoretical values from structures optimized at the respective level of theory with the indicated basis set, except MP2 and CCSD(T), which are single point energy calculations using the B3LYP optimized structures with the indicated basis set.



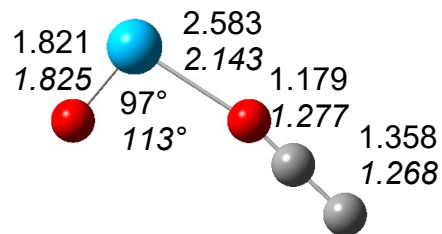

OTh<sup>+</sup>OCC (<sup>4</sup>A'' (<sup>2</sup>A'), C<sub>s</sub>)  
1.34 (-0.12)

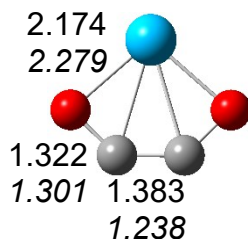

Th<sup>+</sup>(η<sup>4</sup>-OCCO) (<sup>4</sup>A<sub>2,365i</sub> (<sup>2</sup>A<sub>1</sub>), C<sub>2v</sub>)  
1.66 (0.22)

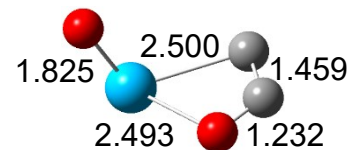

OTh<sup>+</sup>(η<sup>2</sup>-OC(C)) (<sup>4</sup>A, C<sub>1</sub>)  
0.65

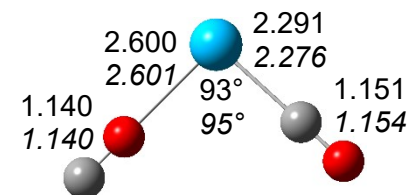

COTh<sup>+</sup>CO (<sup>4</sup>A'' (<sup>2</sup>A''), C<sub>s</sub>)  
0.75 (0.94)

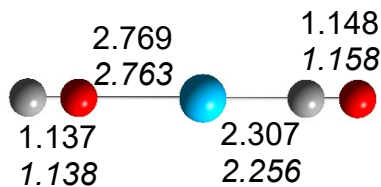

COTh<sup>+</sup>CO (<sup>4</sup>Σ<sup>-</sup> (<sup>2</sup>Π), C<sub>∞v</sub>)  
0.78 (1.75)

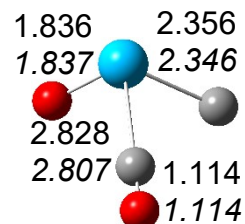

Th<sup>+</sup>(η<sup>3</sup>-OC(CO)) (<sup>4</sup>A (<sup>2</sup>A), C<sub>1</sub>)  
0.79 (1.31)

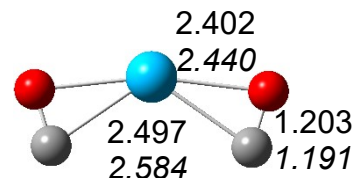

Th<sup>+</sup>(η<sup>3</sup>-OC(CO)) (<sup>4</sup>A (<sup>2</sup>A), C<sub>1</sub>)  
1.37 (1.77)

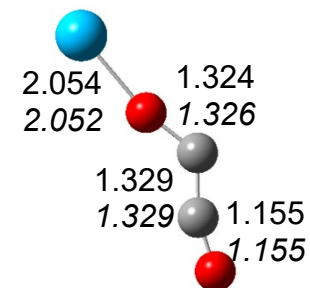

Th<sup>+</sup>OCCO (<sup>4</sup>A'' (<sup>2</sup>A'), C<sub>s</sub>)  
1.46 (1.48)

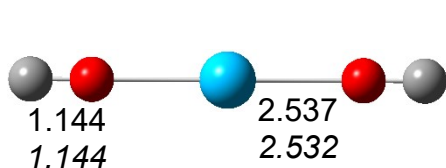

Th<sup>+</sup>(OC)<sub>2</sub> (<sup>4</sup>Σ<sub>g</sub><sup>-</sup> (<sup>2</sup>Π), C<sub>∞v</sub>)  
1.98 (1.74)

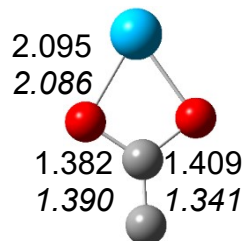

Th<sup>+</sup>(η<sup>2</sup>-OO(CC)) (<sup>4</sup>A<sub>2,91i</sub> (<sup>2</sup>A<sub>1</sub>), C<sub>2v</sub>)  
2.30 (1.55)

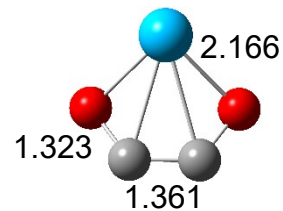

Th<sup>+</sup>(η<sup>4</sup>-OCCO) (<sup>4</sup>A'', C<sub>s</sub>)  
1.22

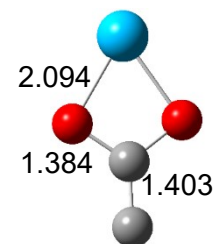

Th<sup>+</sup>(η<sup>2</sup>-OO(CC)) (<sup>4</sup>A'', C<sub>s</sub>)  
2.31

Figure S1. Structures of different isomers of  $[\text{Th},2\text{C},2\text{O}]^+$  and their relative energies in eV with respect to the  $\text{Th}^+(\text{CO})_2$  ( $^4\text{B}_2$ ) state calculated at the B3LYP/cc-pVQZ level. Selected bond lengths ( $\text{\AA}$ ) and bond angles ( $^\circ$ ) are indicated, quartet in roman font and doublet in *italics font*. Some isomers that are spin sensitive and not stable in a particular point group are indicated by their imaginary frequency (i) in  $\text{cm}^{-1}$ . Th – blue, C – grey, O – red. None of these isomers are involved in the rearrangement pathways of  $\text{Th}^+(\text{CO})_2$  to  $\text{OTh}^+\text{CCO}$ , and as such, they are not included in Figures 4 and 5 of the main text.

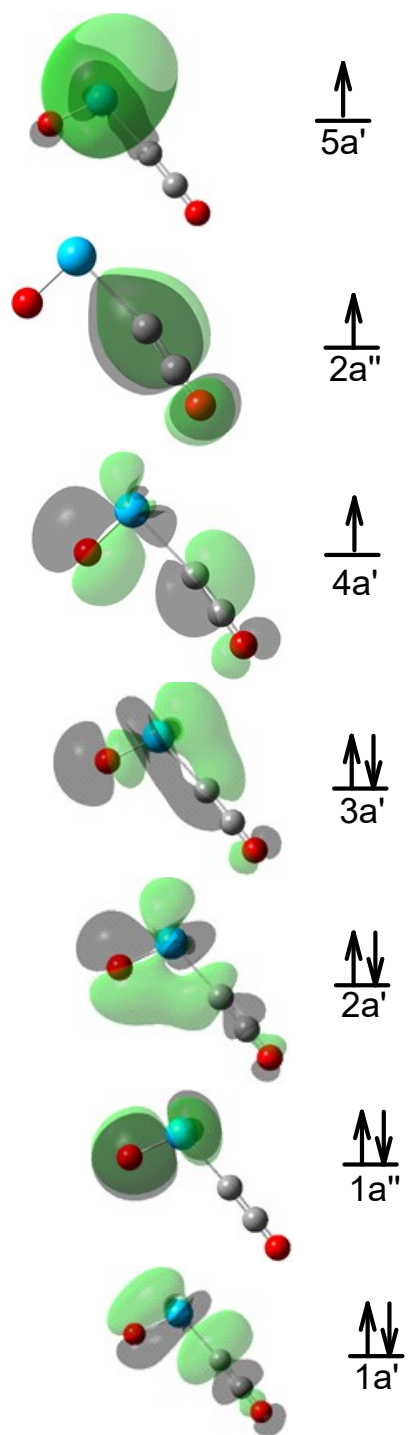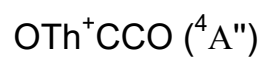

Figure S2. Valence electronic configurations and molecular orbitals for quartet cationic thorium oxide ketenylidene,  $\text{OTh}^+\text{CCO} (^4\text{A}'')$ , as calculated at the B3LYP/cc-pVQZ level. Th – blue, C – grey, O – red.
